# Supplementary material for: Correcting artifacts in ratiometric biosensor imaging; an improved approach for dividing noisy signals
Source: bioRxiv preprint, doi:10.1101/2021.04.13.439673, version 1 (2021-04-14)
Supplement: Supplemental Information [file 439673_file11.PDF]

## Supplementary Information for

### **Correcting artifacts in ratiometric biosensor imaging; an improved approach for dividing noisy signals**

Daniel J. Marston<sup>2</sup>, Scott Slattery<sup>2</sup>, Klaus M. Hahn<sup>2,4,\*</sup>, Denis Tsygankov<sup>1,\*</sup>

<sup>1</sup>Wallace H. Coulter Department of Biomedical Engineering, Georgia Institute of Technology and Emory University, Atlanta, GA.

<sup>2</sup>Department of Pharmacology, University of North Carolina, Chapel Hill, NC.

<sup>4</sup>Lineberger Comprehensive Cancer Center, University of North Carolina, Chapel Hill, NC.

\* To whom correspondence should be addressed

Email: [denis.tsygankov@bme.gatech.edu](mailto:denis.tsygankov@bme.gatech.edu)

#### **This PDF file includes:**

Supplemental Text

**Extended derivation of the mathematical expression in section “A hypothetical cell model illustrating effects of noise on ratio values”:**

$$\frac{s_F x + b_F + n_F}{s_D x + b_D + n_D} = \frac{s_F \left( x + \frac{b_D}{s_D} \right) + \left( b_F - s_F \frac{b_D}{s_D} \right) + n_F}{s_D \left( x + \frac{b_D}{s_D} \right) + n_D}$$

Here, the first step is to add  $\left( s_F \frac{b_D}{s_D} - s_F \frac{b_D}{s_D} \right)$ , which is **zero**, to the numerator and multiply  $b_D$  by  $\frac{s_D}{s_D}$ , which is **one**, in the denominator. Second step is combining terms. The last step is taking  $s_F$  and  $s_D$  out of brackets:

$$\begin{aligned} \frac{s_F x + b_F + n_F}{s_D x + b_D + n_D} &= \frac{s_F x + \left( s_F \frac{b_D}{s_D} - s_F \frac{b_D}{s_D} \right) + b_F + n_F}{s_D x + \frac{s_D}{s_D} b_D + n_D} = \frac{s_F x + s_F \frac{b_D}{s_D} - s_F \frac{b_D}{s_D} + b_F + n_F}{s_D x + \frac{s_D}{s_D} b_D + n_D} \\ &= \frac{\left( s_F x + s_F \frac{b_D}{s_D} \right) + \left( -s_F \frac{b_D}{s_D} + b_F \right) + n_F}{\left( s_D x + \frac{s_D}{s_D} b_D \right) + n_D} = \frac{s_F \left( x + \frac{b_D}{s_D} \right) + \left( b_F - s_F \frac{b_D}{s_D} \right) + n_F}{s_D \left( x + \frac{b_D}{s_D} \right) + n_D} \end{aligned}$$

**Extended derivation of the mathematical expression in section “Use of a noise correction factor; identification and correction of artifacts without using direct background subtraction”:**

$$\text{Ratio}(x, y) = \frac{\text{image1}(x, y)}{\text{image2}(x, y)} = \frac{a_0(S_2(x, y) + B_2) + (B_1 - a_0 B_2) + N_1(x, y)}{(S_2(x, y) + B_2) + N_2(x, y)}$$

Here, the first step is to add  $(a_0 B_2 - a_0 B_2)$ , which is **zero**, to the numerator and combine the terms as highlighted in cyan and gray. The last step is taking  $a_0$  out of brackets:

$$\begin{aligned} \text{Ratio}(x, y) &= \frac{\text{image1}(x, y)}{\text{image2}(x, y)} = \frac{a_0 S_2(x, y) + B_1 + N_1(x, y)}{S_2(x, y) + B_2 + N_2(x, y)} \\ &= \frac{a_0 S_2(x, y) + a_0 B_2 - a_0 B_2 + B_1 + N_1(x, y)}{S_2(x, y) + B_2 + N_2(x, y)} \\ &= \frac{a_0 S_2(x, y) + a_0 B_2 - a_0 B_2 + B_1 + N_1(x, y)}{S_2(x, y) + B_2 + N_2(x, y)} \\ &= \frac{a_0 (S_2(x, y) + B_2) + (B_1 - a_0 B_2) + N_1(x, y)}{(S_2(x, y) + B_2) + N_2(x, y)} \end{aligned}$$
